## Research Article

# Revealing mechanism of *Caulis Sargentodoxae* for the treatment of ulcerative colitis based on network pharmacology approach

Bin Liu<sup>1,2,\*</sup>, Xin Zheng<sup>2,\*</sup>, Jiajun Li<sup>2</sup>, Xiong Li<sup>2</sup>, Ruimei Wu<sup>2</sup>, Jing Yang<sup>3</sup>, Wei Liu<sup>2</sup> and  Gaoping Zhao<sup>1,4</sup>

<sup>1</sup>Graduate School, Southwest Medical University, Luzhou, Sichuan 646000, China; <sup>2</sup>Department of General Surgery, The Second Affiliated Hospital of Chengdu Medical College, China National Nuclear Corporation 416 Hospital, Chengdu, Sichuan 610051, China; <sup>3</sup>The School of Biological Science and Technology, Chengdu Medical College, Chengdu 610083, China; <sup>4</sup>Department of Gastrointestinal Surgery, Sichuan Academy of Medical Sciences and Sichuan Provincial People's Hospital, Chengdu, Sichuan 610072, China

**Correspondence:** Gaoping Zhao (gzhao@uestc.edu.cn)

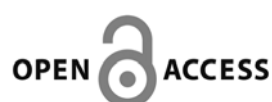

**Objective:** The traditional Chinese medicine *Caulis Sargentodoxae* is widely used in the treatment of ulcerative colitis (UC), but the mechanism remains unknown. The present study aims to reveal its effective components, targets and pathways through network pharmacology and bioinformatics approaches.

**Materials and methods:** Traditional Chinese Medicine Systems Pharmacology Database and Analysis Platform (TCMSP) was used to identify effective components. The ligand-based targets prediction was achieved through SwissTargetPrediction and Target-Net. UC-related targets were identified using Gene Expression Omnibus (GEO) data and DisGeNET. The common targets of disease and components were constructed and analyzed by PPI network. Lastly, Gene Ontology (GO) and Kyoto Encyclopedia of Genes and Genomes (KEGG) enrichment analyses are used to explain the functions of these common targets. Components-Targets-Pathways network was visualized and analyzed to further reveal the connection between the components and targets.

**Results:** Eight active components and 102 key targets were identified to play an important role in UC. These targets were related to regulation of protein serine/threonine kinase activity, positive regulation of cell motility, response to molecule of bacterial origin, response to toxic substance, ERK1 and ERK2 cascade, peptidyl-tyrosine modification, inositol lipid-mediated signaling, cellular response to drug, regulation of inflammatory response and leukocyte migration. Moreover, HIF-1 signaling pathway and PI3K-Akt signaling pathway were the key targets involved in UC-related signaling pathways.

**Conclusion:** The eight active components of *Caulis Sargentodoxae* mainly play a therapeutic role for UC through synergistic regulation of HIF-1 signaling pathway and PI3K-Akt signaling pathway.

\*These authors contributed equally to this work.

Received: 18 November 2020

Revised: 07 January 2021

Accepted: 08 January 2021

Accepted Manuscript online:  
12 January 2021

Version of Record published:  
29 January 2021

## Introduction

Ulcerative colitis (UC) is a disease caused by a genetically predisposed host's immune disorder to antigens in the intestine, and its incidence and prevalence are increasing globally [1,2]. The disease has the characteristics of remission and flare, and in most cases drugs are used to induce and maintain remission. However, up to 15% of cases require surgery due to medical treatment failure or inflammation that develops into dysplasia [3]. The primary treatment goal of UC is to achieve disease remission, prevent disease-related complications, surgery and tumor, and maintain

the quality of life of patients [4]. The currently available data indicated that UC is an intestinal barrier disease, which is caused by epithelial cells or structural intestinal epithelial dysfunction, or strong inflammatory mediators and cells in the lamina propria to produce an inflammatory cascade. Therefore, treatment strategies can target epithelial cells or inflammatory cells to restore the intestinal barrier function and achieve clinical remission [5]. Currently, drugs used for UC include 5-aminosalicylic acid, steroids and immunosuppressants. However, long-term use of these drugs may cause a variety of side effects, such as liver and kidney toxicity, drug resistance and allergic reactions [6].

The use of herbs to treat various diseases has a long history. In addition, traditional Chinese medicine shows obvious advantages in the treatment of UC, such as low recurrence rate and fewer side effects [6]. Some natural active compounds have good therapeutic effects on experimental UC models. SM934 is a water-soluble artemisinin analog with anti-inflammatory and immunomodulatory effects. It was found to improve DSS-induced UC in mice by inhibiting neutrophils and macrophages [7]. Indigo Naturalis has been proven effective in a randomized, placebo-controlled trial [8]. However, there were potential adverse effects, including pulmonary hypertension [8]. This also reflects the complexity of Chinese herbal medicine.

Network pharmacology methods are rapidly evolving and applied to find new treatment opportunities and repositioning of approved drugs. They can also effectively map the unexplored targets of natural products, thereby providing drug space for proteins related to various complex diseases [9]. The purpose of constructing the network is to realize the interaction between bioactive compounds and target proteins and the interaction between various target proteins, and then to identify and verify the key nodes through network analysis and verification [10]. Network pharmacology has been successfully used to reveal the active ingredients and mechanisms of indigo naturalis in the treatment of UC [11]. *Caulis Sargentodoxae* is also a high-frequency herb used in the treatment of UC. As a heat-clearing and detoxifying Chinese medicine, it has been found to have significant anti-inflammatory, anti-thrombotic, anti-tumor and anti-bacterial effects [12]. However, its active ingredients and targets are still unclear. The present study is based on the network pharmacology approaches and bioinformatics technologies to clarify the mechanism of *Caulis Sargentodoxae* in the treatment of UC, and to provide new candidate compounds for the treatment of UC. The entire workflow is shown in Figure 1.

## Materials and methods

### Components acquisition and screening

Traditional Chinese Medicine Systems Pharmacology Database and Analysis Platform (TCMSP) is a manually curated database containing 12144 herbal compounds and related pharmacokinetic properties (<https://tcmsp.com/tcmssp.php>) [13]. Oral bioavailability (OB), Drug-likeness (DL), Caco-2 permeability and other parameters information can be obtained from it. The components and characteristics of *Caulis Sargentodoxae* were retrieved from TCMSP. According to its suggested drug screening criteria, the components were screened. Finally, the compounds with molecular weight (MW) from 180 to 500 Dalton,  $OB \geq 20\%$ ,  $DL \geq 0.1$  were retained.

### Targets collection of components in *Caulis Sargentodoxae*

Drug-targets prediction technology, which can predict component targets with high throughput and quickly, has been widely used in the preliminary research of drug development. The current prediction technologies mainly include ligands-based prediction methods (such as chemical similarity search, pharmacophore models etc.), targets-based prediction methods (such as reverse molecular docking) and machine learning methods. SwissTargetPrediction is a ligand-based targets prediction tool for bioactive small molecules (<http://www.swisstargetprediction.ch/>). The principle is to train the prediction model by multivariate logistic regression fitting of various size related subsets of known active molecules to weighted 2D and 3D similarity parameters [14]. TargetNet builds a large number of QSAR models based on current chemical and genomics data for molecular target prediction (<http://targetnet.scbdd.com/calcnnet/index/>). Its server will predict the activity of user-submitted molecules in 623 human proteins by building a high-quality QSAR model for each human protein [15]. The structures and SMILES of each component were obtained from PubChem (<https://pubchem.ncbi.nlm.nih.gov/>). Subsequently, the SMILES of each component were uploaded to two databases for targets prediction.

### Acquisition of UC disease targets

Gene Expression Omnibus (GEO) is an ever-increasing platform for storing high-throughput sequencing data. Integrating sequencing information from different centers and performing gene differential expression analysis will facilitate the identification of disease treatment targets. We identified three series from GEO that all came from GPL6244,

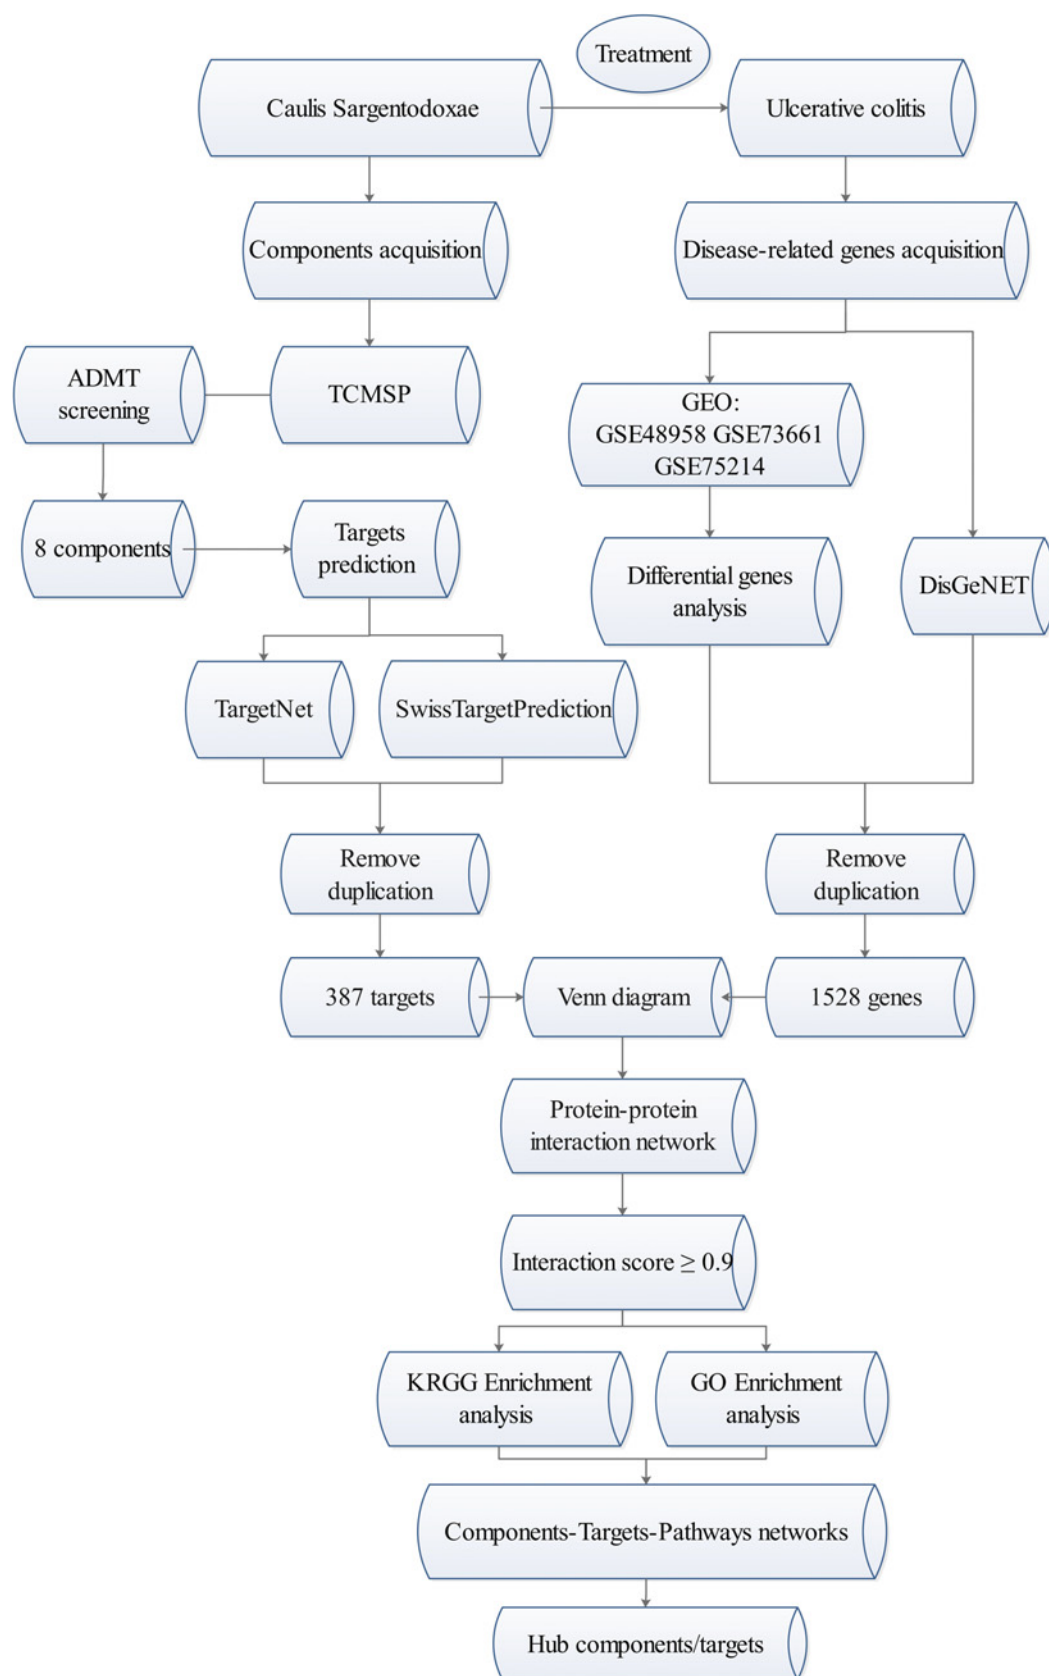

**Figure 1. Work flow of the present study**

among which GSE73661 contains 23 active UC tissues and 12 normal tissues, GSE75214 contains 74 active UC tissues and 11 normal tissues, GSE48958 contains 7 active UC tissues and 8 normal tissues. Genes with adjusted  $P < 0.05$  and  $\log_2$  (fold change)  $> 2$  or  $\log_2$  (fold change)  $< -2$  were considered as differential genes, they have played an important role in the development of UC.

DisGeNET integrated data from public databases, GWASs, animal models and scientific literature, and collected a large number of variants and genes associated with human diseases (<https://www.disgenet.org/>). It currently covers more than 24000 diseases and traits, 17000 genes and 117000 genomic variants [16]. UC-related genes were also obtained via using 'ulcerative colitis' as the keyword to retrieve relevant genes in DisGeNET.

## Construction and analysis of target protein-protein interaction network

STRING (<https://string-db.org/>) can carry out direct (physical) and indirect (functional) interactions of proteins to achieve a comprehensive and objective network [17]. The targets were uploaded in the form of gene symbol, the species was selected as '*Homo sapiens*', and the minimum required interaction score threshold 'highest confidence ( $\geq 0.9$ )' was set to obtain protein interaction information. Cytoscape v3.7.2 was used for visualization and in-depth analysis of the network. The hub nodes were identified in each network by calculating the size of the degree.

## Gene ontology and Kyoto Encyclopedia of Genes and Genomes signal pathway enrichment analysis

Gene ontology (GO) is a gene function classification system that comprehensively describes the attributes of genes and gene products of various species through dynamically updated GO terms. It is used to describe the biological process (BP), the cellular component (CC) and molecular function (MF) of gene sets of interest. Kyoto Encyclopedia of Genes and Genomes (KEGG) is a knowledge base for systematic analysis of gene function, which can describe pathway data involved in genes of interest, including connection of metabolism, membrane transport, signal transduction and cell cycle, etc. We used WebGestalt (<http://www.webgestalt.org/#>), a network enrichment analysis tool, for GO and KEGG enrichment analyses. The reference set was selected as human genome protein encoding. And the enrichment method was selected as over-representation analysis.

## Construction and analysis of components-targets-pathways network

Components-Targets-Pathways network was constructed and visualized via Cytoscape v3.7.2 to identify key molecules and targets. The degrees of each component and target were calculated using CytoHubba.

## Toxicity prediction of components in *Caulis Sargentodoxae*

AdmetSAR 2.0 was a free tool and continually updated database for the prediction of ADMET properties, and has been widely used in chemical and pharmaceutical fields [18,19]. Each molecule's SMILES was input to obtain organ toxicity and other toxic properties.

## Results

### Components of *Caulis Sargentodoxae*

Nine eligible valid results were screened through TCMSP database, with  $OB \geq 20\%$ ,  $DL \geq 0.1$  and  $500 \geq MW \geq 180$  Dalton. These molecules have good OB and DL properties (Table 1 and Supplementary Figure S1). We have also made a toxicity prediction for compounds with SMILES. Analysis found that they have no carcinogenicity, but emodin and physcion may have hepatotoxicity. And physcion and (-)-catechin were positive in Ames mutagenesis (Supplementary Table S1).

### Putative targets of components

In both SwissTargetPrediction and TargetNet, we selected targets with a probability greater than 0 for subsequent analysis. Due to the lack of structural information and SMILES, we failed to obtain the targets of syringaresinol diglucoside-qt. The other 8 components get 396 targets through SwissTargetPrediction, and 719 targets through TargetNet. A total of 387 unique targets of 8 components were obtained after removal of the repeats. The relationship among the 8 components and the 387 targets was shown in Figure 2.

### UC-related targets

GSE73661, GSE75214 and GSE48958 were respectively analyzed for differential genes. Through the Venn diagram, we obtained 87 common up-regulated genes and 42 common down-regulated genes from three series (Figure 3A,B).



Table 1 Parameter information of molecules in Caulis Sargentodoxae

| TCMSP ID  | Molecule name                                            | Pubchem Cid   | MW     | OB (%) | DL   |
|-----------|----------------------------------------------------------|---------------|--------|--------|------|
| MOL000358 | β-sitosterol                                             | 222284        | 414.79 | 36.91  | 0.75 |
| MOL000359 | Sitosterol                                               | 12303645      | 414.79 | 36.91  | 0.75 |
| MOL000472 | Emodin                                                   | 3220          | 270.25 | 24.4   | 0.24 |
| MOL000476 | Physcion                                                 | 10639         | 284.28 | 22.29  | 0.27 |
| MOL007920 | Meso-dihydroguaiaretic acid                              | 476856        | 330.46 | 31.32  | 0.26 |
| MOL007923 | 3-(4-Hydroxyphenyl)acrylic acid 4-hydroxyphenethyl ester | 16119626      | 284.33 | 93.36  | 0.21 |
| MOL007925 | Glucosyringic acid                                       | 10383888      | 360.35 | 24.29  | 0.3  |
| MOL000096 | (-)-Catechin                                             | 73160         | 290.29 | 49.68  | 0.24 |
| MOL007922 | Syringaresnol diglucoside_qt                             | Not available | 418.48 | 29.84  | 0.72 |

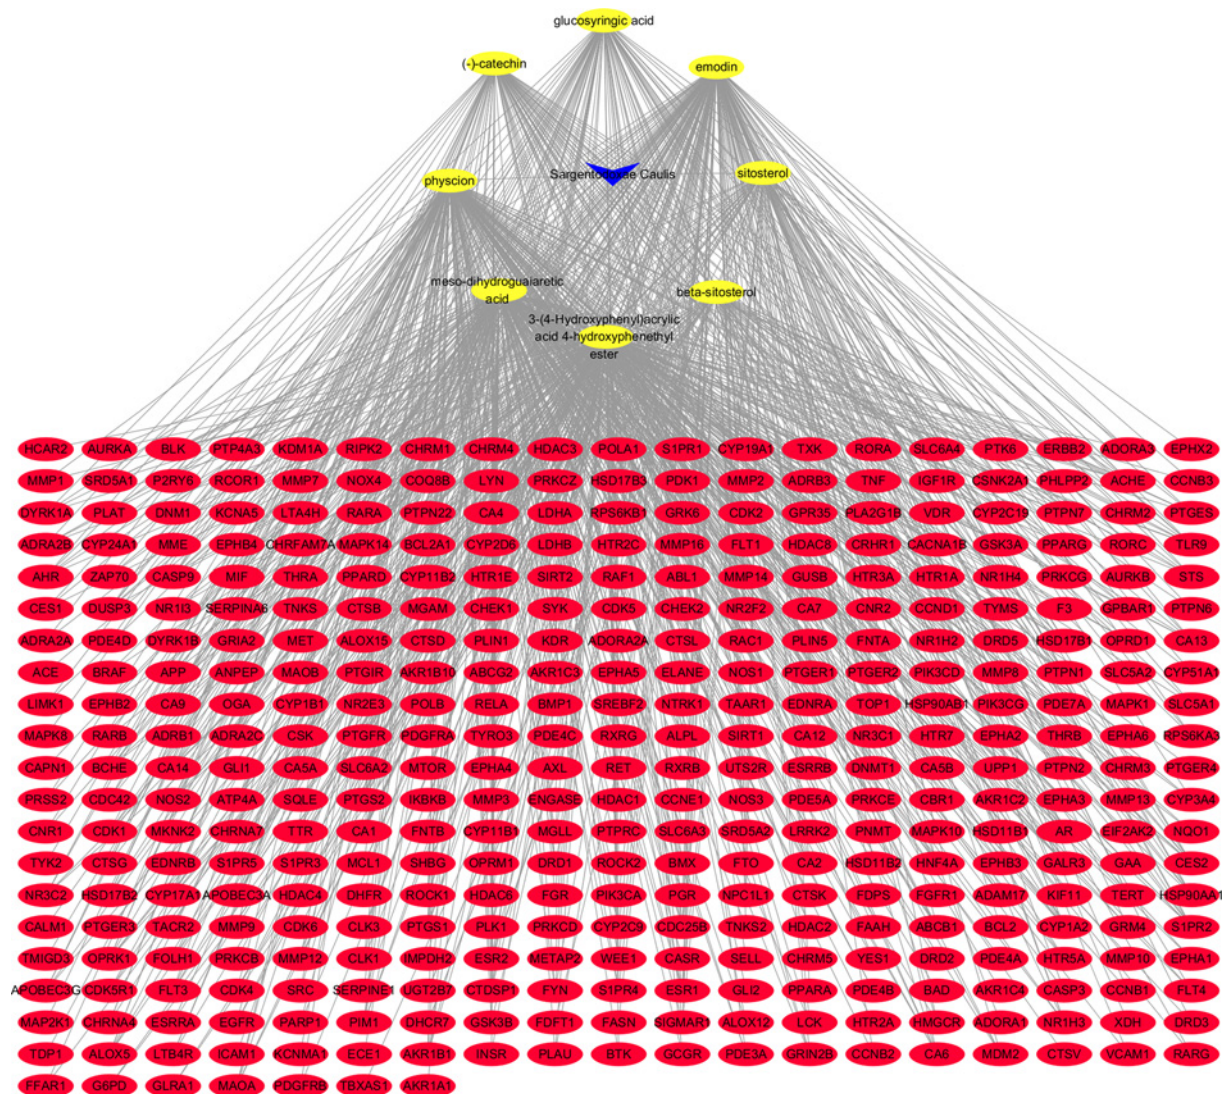

Figure 2. Components-targets-network of Caulis Sargentodoxae  
The yellow ellipses represent the components, and the red ellipses represent the targets of components in Caulis Sargentodoxae.

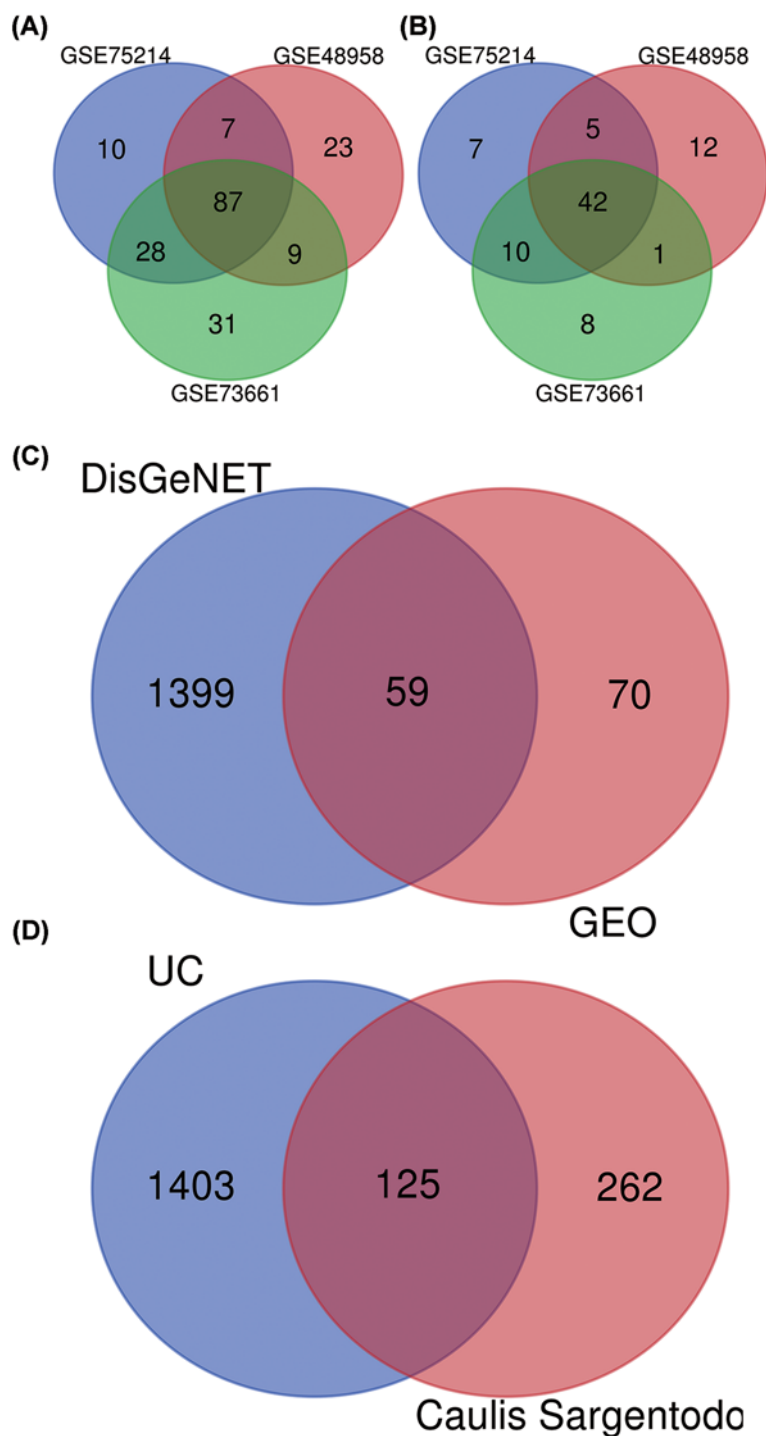

**Figure 3. Work flow of targets screening**

(A) Venn diagram of up-regulated genes in UC from three GEO series. (B) Venn diagram of down-regulated genes in UC from three GEO series. (C) Venn diagram of targets of UC from differential genes (GEO) and DisGeNET. (D) Venn diagram of targets from UC and *Caulis Sargentodoxae*.

Table 2 Hub genes in PPI network

| Rank | Name            | Score |
|------|-----------------|-------|
| 1    | <i>SRC</i>      | 56    |
| 2    | <i>PIK3CA</i>   | 54    |
| 3    | <i>MAPK1</i>    | 48    |
| 4    | <i>HSP90AA1</i> | 36    |
| 5    | <i>MAPK8</i>    | 34    |
| 5    | <i>ESR1</i>     | 34    |
| 7    | <i>EGFR</i>     | 30    |
| 7    | <i>LYN</i>      | 30    |
| 7    | <i>RAC1</i>     | 30    |
| 10   | <i>RELA</i>     | 28    |
| 11   | <i>TNF</i>      | 24    |
| 11   | <i>MAPK14</i>   | 24    |
| 13   | <i>S1PR1</i>    | 22    |
| 14   | <i>MMP2</i>     | 20    |
| 14   | <i>MMP9</i>     | 20    |
| 14   | <i>PRKCB</i>    | 20    |

In addition, we obtained 1458 UC-related targets from DisGeNET. A total of 1528 unique targets of UC were obtained after removal of the repeats (Figure 3C). By comparing the components targets and the disease targets through the Venn diagram, 125 targets for the treatment of UC were identified (Figure 3D). These targets may be the key proteins of *Caulis Sargentodoxae* in the treatment of UC.

PPI network of 125 common targets

We constructed PPI networks with threshold ‘highest confidence ( $\geq 0.9$ )’ in STRING. A network with 102 nodes and 618 edges was obtained (Figure 4). Based on the degree, we identified the key targets among them, including SRC, PIK3CA, MAPK1, HSP90AA1, MAPK8, ESR1, EGFR, LYN, RAC1, RELA, TNF, MAPK14, S1PR1, MMP2, MMP9, PRKCB (Table 2).

GO and KEGG enrichment analyses

Using WebGestalt to conduct bioinformatics analysis of the above key targets. We identified the top ten GO terms and pathways that were significantly enriched, respectively (Figures 5 and 6). In UC, the BPs mainly regulated by *Caulis Sargentodoxae* were regulation of protein serine/threonine kinase activity, positive regulation of cell motility, response to molecule of bacterial origin, response to toxic substance, ERK1 and ERK2 cascade, peptidyl-tyrosine modification, inositol lipid-mediated signaling, cellular response to drug, regulation of inflammatory response and leukocyte migration (Table 3).

In UC, the pathways mainly regulated by *Caulis Sargentodoxae* were Pathways in cancer, Proteoglycans in cancer, Endocrine resistance, Prostate cancer, AGE-RAGE signaling pathway in diabetic complications, HIF-1 signaling pathway, MicroRNAs in cancer, Fluid shear stress and atherosclerosis, PI3K-Akt signaling pathway and EGFR tyrosine kinase inhibitor resistance (Table 4). Among them, the changes of HIF-1 signaling pathway and PI3K-Akt signaling pathway are most closely related to UC.

Components-targets-pathways network

The key targets of *Caulis Sargentodoxae* enriched to HIF-1 signaling pathway were BCL2, EGFR, ERBB2, FLT1, IGF1R, INSR, MAPK1, MKNK2, NOS2, NOS3, PIK3CA, PIK3CD, PRKCB, RELA, RPS6KB1 and SERPINE1 (Supplementary Figure S2). The key targets of *Caulis Sargentodoxae* enriched to PI3K-Akt signaling pathway were BCL2, CASP, CCND1, CCNE1, EGFR, ERBB2, FGFR1, FLT1, HSP90AA1, IGF1R, INSR, KDR, MAPK1, MCL1, MDM2, MET, NOS3, NTRK1, PIK3CA, PIK3CD, PIK3CG, RAC1, RELA, RPS6KB1 (Supplementary Figure S3). In the PPI network, EGFR, PRKCB, MAPK1, HSP90AA1, RELA, RAC1, PIK3CA were also identified as hub genes.

Moreover, we constructed components-targets-pathways network with 8 components, 102 hub targets and HIF-1 signaling pathway and PI3K-Akt signaling pathway (Figure 7). The network showed that these eight molecules were involved in regulating HIF-1 signaling pathway and PI3K-Akt signaling pathway. In this network, we further identified key molecules and targets using degrees (Table 5). Physcion, emodin, 3-(4-Hydroxyphenyl)acrylic acid



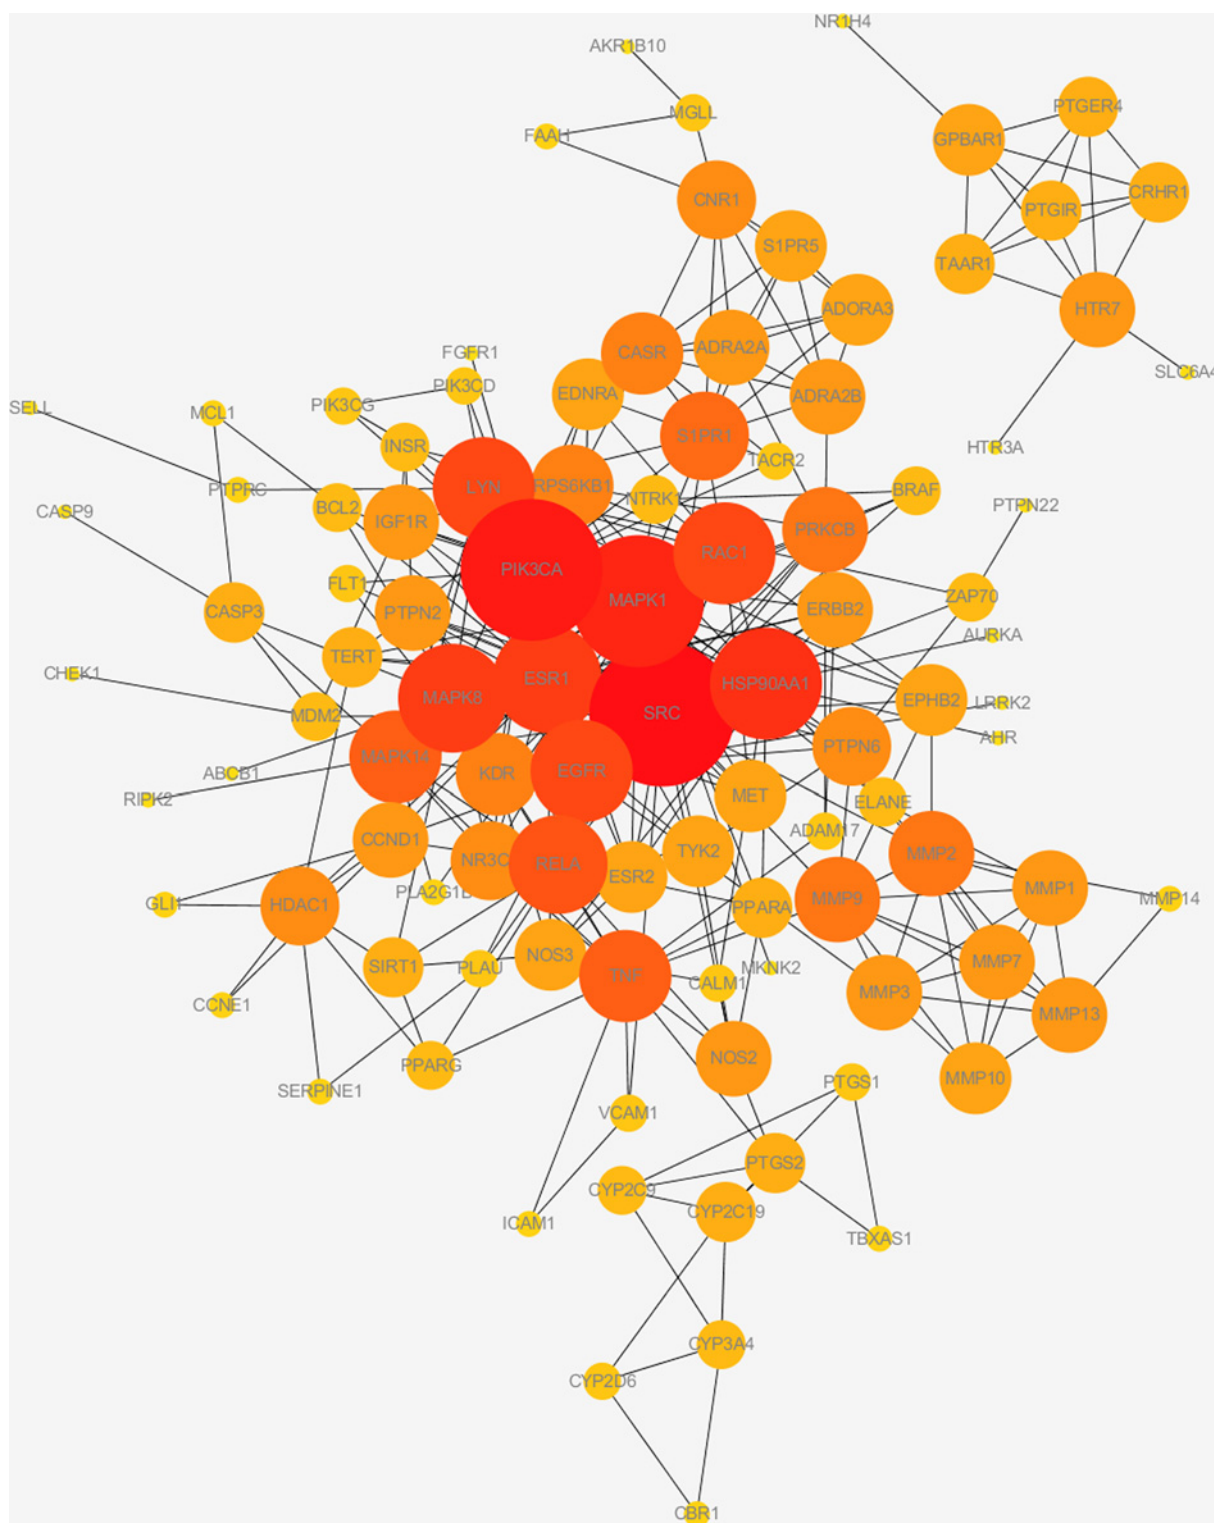

**Figure 4.** PPI network of common targets in UC and *Caulis Sargentodoxae* (interaction score  $\geq 0.9$ )  
The darker nodes represent higher degrees.



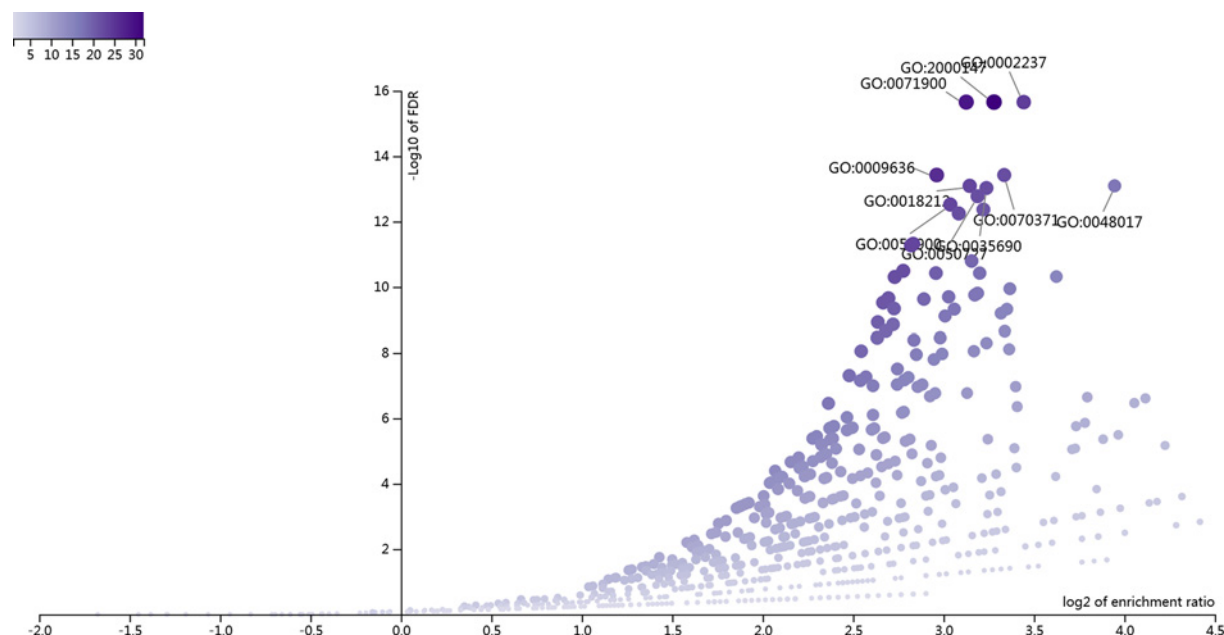

**Figure 5.** Volcano plot of the top ten significantly enriched GO terms of the common targets in UC and *Caulis Sargentodoxae*

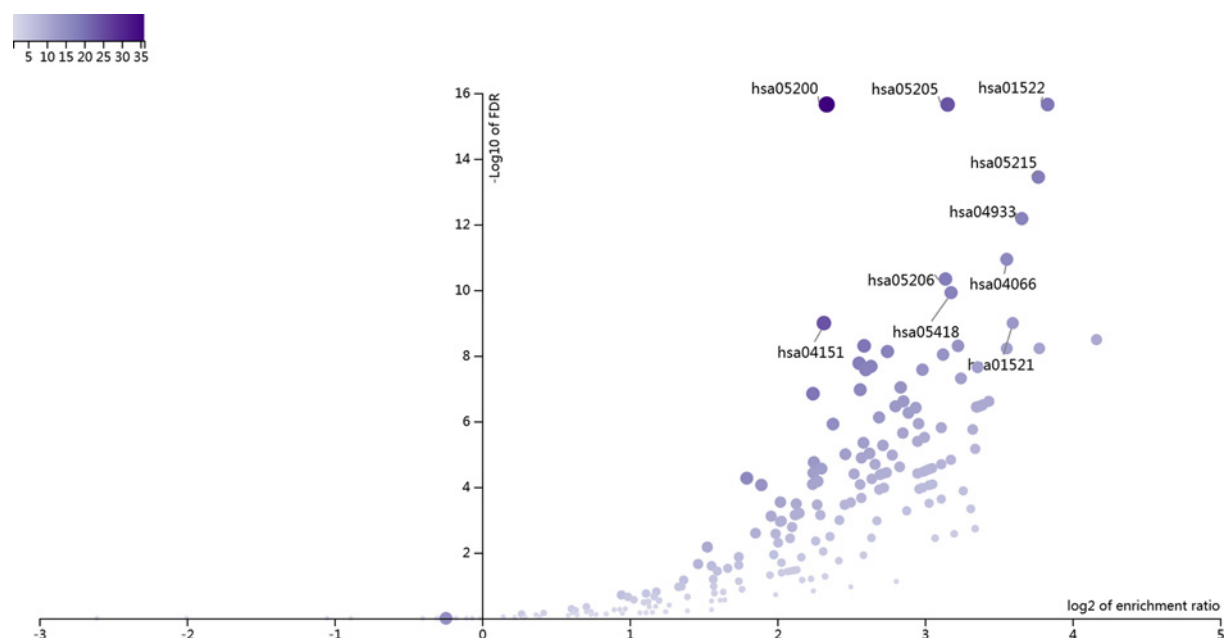

**Figure 6.** Volcano plot of the top ten significantly enriched pathways of the common targets in UC and *Caulis Sargentodoxae*

4-hydroxyphenethyl ester and meso-dihydroguaiaretic acid were the most important components that regulates the above two pathways.

## Discussion

Although drugs such as aminosaliclate, glucocorticoids, antibiotics and anti-TNF $\alpha$  play a good role in the treatment of UC, they still fail to achieve healing results and often cause side effects [20]. In China, traditional Chinese medicine prescriptions are widely used to treat recurrent UC. The mechanism of these drug combination based on the basic theory of traditional Chinese medicine is often difficult to elucidate due to the complexity of the components. The holistic view of Chinese medicine has a lot in common with the key ideas of network pharmacology and systems

**Table 3 Top ten significantly enriched GO terms of key targets**

| Gene set   | Description                                            | Size | Expect | Ratio  | P-value  | FDR      |
|------------|--------------------------------------------------------|------|--------|--------|----------|----------|
| GO:0071900 | Regulation of protein serine/threonine kinase activity | 497  | 3.323  | 8.7272 | 0        | 0        |
| GO:2000147 | Positive regulation of cell motility                   | 493  | 3.2962 | 9.7081 | 0        | 0        |
| GO:0002237 | Response to molecule of bacterial origin               | 330  | 2.2064 | 10.878 | 0        | 0        |
| GO:0009636 | Response to toxic substance                            | 499  | 3.3363 | 7.793  | 2.22E-16 | 3.77E-14 |
| GO:0070371 | ERK1 and ERK2 cascade                                  | 326  | 2.1796 | 10.093 | 2.22E-16 | 3.77E-14 |
| GO:0018212 | Peptidyl-tyrosine modification                         | 389  | 2.6009 | 8.8432 | 6.66E-16 | 8.09E-14 |
| GO:0048017 | Inositol lipid-mediated signaling                      | 165  | 1.1032 | 15.41  | 6.66E-16 | 8.09E-14 |
| GO:0035690 | Cellular response to drug                              | 349  | 2.3334 | 9.4282 | 8.88E-16 | 9.44E-14 |
| GO:0050727 | Regulation of inflammatory response                    | 361  | 2.4137 | 9.1148 | 1.78E-15 | 1.68E-13 |
| GO:0050900 | Leukocyte migration                                    | 419  | 2.8014 | 8.21   | 3.55E-15 | 3.02E-13 |

**Table 4 Top ten significantly enriched pathways of key targets**

| Gene set | Description                                          | Size | Expect | Ratio  | P-value  | FDR      |
|----------|------------------------------------------------------|------|--------|--------|----------|----------|
| hsa05200 | Pathways in cancer                                   | 524  | 7.1346 | 5.0458 | 0        | 0        |
| hsa05205 | Proteoglycans in cancer                              | 198  | 2.6959 | 8.9024 | 0        | 0        |
| hsa01522 | Endocrine resistance                                 | 98   | 1.3343 | 14.239 | 0        | 0        |
| hsa05215 | Prostate cancer                                      | 97   | 1.3207 | 13.629 | 4.44E-16 | 3.62E-14 |
| hsa04933 | AGE-RAGE signaling pathway in diabetic complications | 99   | 1.348  | 12.612 | 1.02E-14 | 6.66E-13 |
| hsa04066 | HIF-1 signaling pathway                              | 100  | 1.3616 | 11.751 | 2.13E-13 | 1.16E-11 |
| hsa05206 | MicroRNAs in cancer                                  | 150  | 2.0424 | 8.8133 | 9.90E-13 | 4.61E-11 |
| hsa05418 | Fluid shear stress and atherosclerosis               | 138  | 1.879  | 9.0475 | 2.93E-12 | 1.20E-10 |
| hsa04151 | PI3K-Akt signaling pathway                           | 354  | 4.82   | 4.9793 | 3.10E-11 | 1.02E-09 |
| hsa01521 | EGFR tyrosine kinase inhibitor resistance            | 79   | 1.0756 | 12.086 | 3.11E-11 | 1.02E-09 |

biology. This network-based approach can explain the combination rules and network regulation effects of herbal formulas [21]. Network pharmacology strategies were successfully used to reveal mechanism of Lang Chuang Wan in treating systemic lupus erythematosus [22] and Yizhiqingxin formula on Alzheimer's disease [23].

Combined with the bioinformatics research on diseases, we can more clearly define the targets and specific mechanisms of Chinese medicine on the diseases, and identify key active molecules. This is of great significance to the development of natural medicines and the treatment of diseases. In our study, we successfully identified eight active molecules and two important pathways related to UC through network pharmacology and bioinformatics. They played a synergistic role in regulating HIF-1 signaling pathway and PI3K-Akt signaling pathway. Current evidences showed that Treg/Th17 imbalance is closely related to UC. The mTOR-HIF-1 $\alpha$ -Th17 and STAT3-HIF-1 $\alpha$ -Th17 pathways play an important role in the development of Th17 and the activation of IL-17. In addition, HIF-1 $\alpha$  can bind to Foxp3, thereby affecting the development and function of Treg [24]. PI3K can respond to LPS and TNF- $\alpha$ , thereby activating Akt and affecting NF- $\kappa$ B to produce anti-apoptotic and pro-inflammatory effects [25]. Therefore, *Caulis Sargentodoxae* can improve UC by regulating them.

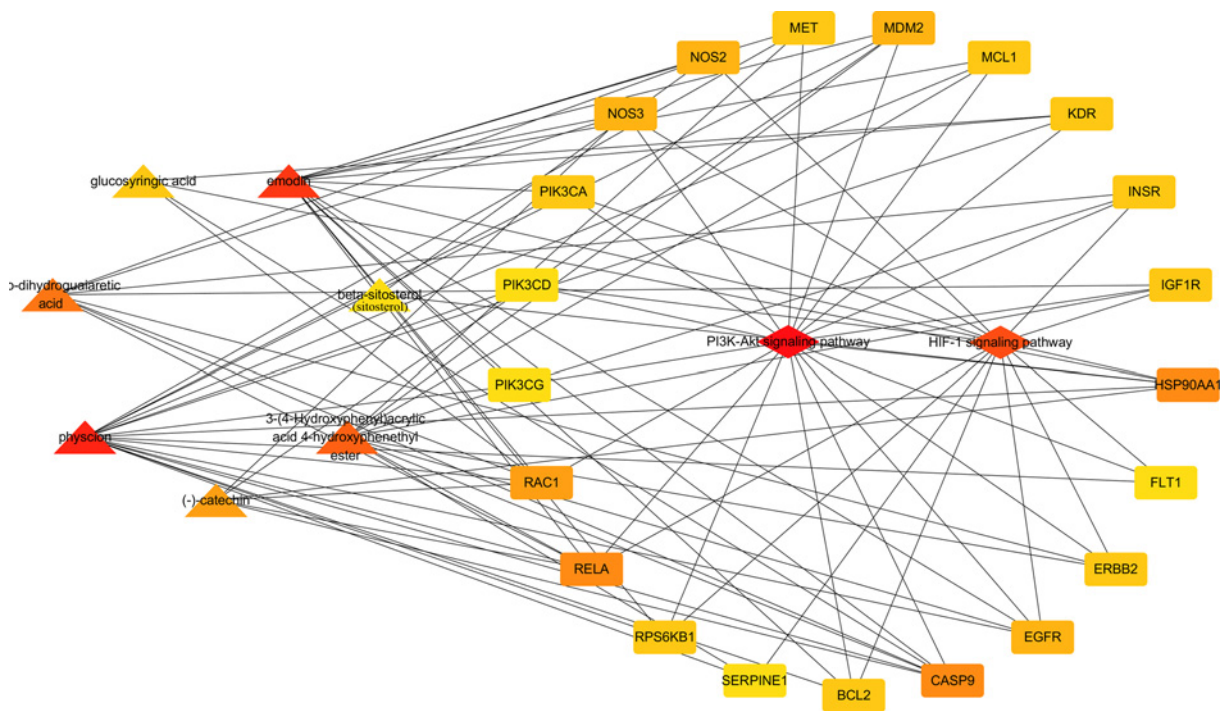

**Figure 7. Components-targets-pathways network of *Caulis Sargentodoxae***  
The triangles represent the components, the quadrangles represent the pathways, and the squarenesses represent the targets that can be regulated by the components and are in the pathways. The darker nodes represent higher degrees.

**Table 5 Hub genes/molecules in components-targets-pathways network**

| Rank | Name                                                     | Score |
|------|----------------------------------------------------------|-------|
| 1    | Physcion                                                 | 18    |
| 2    | Emodin                                                   | 17    |
| 3    | 3-(4-Hydroxyphenyl)acrylic acid 4-hydroxyphenethyl ester | 12    |
| 4    | Meso-dihydroguaiaretic acid                              | 9     |
| 5    | CASP9                                                    | 7     |
| 5    | RELA                                                     | 7     |
| 5    | HSP90AA1                                                 | 7     |
| 8    | (-)-Catechin                                             | 6     |
| 8    | RAC1                                                     | 6     |
| 10   | MDM2                                                     | 5     |
| 10   | NOS3                                                     | 5     |
| 10   | NOS2                                                     | 5     |
| 10   | EGFR                                                     | 5     |
| 14   | MET                                                      | 4     |
| 14   | BCL2                                                     | 4     |
| 14   | PIK3CA                                                   | 4     |
| 14   | Glucosyringic acid                                       | 4     |
| 14   | RPS6KB1                                                  | 4     |
| 14   | ERBB2                                                    | 4     |
| 14   | KDR                                                      | 4     |
| 14   | MCL1                                                     | 4     |
| 14   | INSR                                                     | 4     |
| 14   | IGF1R                                                    | 4     |
| 24   | β-sitosterol                                             | 3     |
| 24   | PIK3CG                                                   | 3     |
| 24   | PIK3CD                                                   | 3     |
| 24   | SERPINE1                                                 | 3     |
| 24   | FLT1                                                     | 3     |

According to Components-Targets-Pathways network, the degrees of physcion, emodin, 3-(4-Hydroxyphenyl)acrylic acid 4-hydroxyphenethyl ester and meso-dihydroguaiaretic acid were the highest. Physcion is an anthraquinone compound commonly found in various plants, and shows anti-cancer properties in a variety of tumors. It can significantly inhibit the production of LPS/IFN- $\gamma$ -induced NO in various cells via attenuating iNOS [26]. It can also reduce the gene expression of TNF- $\alpha$ , IL-6 and IL-1 $\beta$  in hepatocellular carcinoma cells induced by LPS in a dose-dependent manner by regulating p38 [27]. This indicated that it has good anti-inflammatory ability. And in our study, it was also identified as the most critical component for the treatment of UC. Emodin is a natural anthraquinone derivative with a wide range of pharmacological properties, including anticancer, liver protection, anti-inflammatory, antioxidant and antibacterial activities [28]. Emodin was found to induce autophagy in L02 human hepatocytes by inhibiting PI3K/AKT/mTOR signaling pathway [29]. Emodin was found to protect mice from DSS-induced colitis via the regulation of TLR5/NF- $\kappa$ B signaling pathway [30], and significantly inhibit LPS-mediated NF- $\kappa$ B activation and DNA binding activity in RAW264.7 cells [31]. This is consistent with our computer-based research, and indicates that emodin can regulate PI3K-Akt signaling pathway to exert anti-inflammatory effects. Meso-dihydroguaiaretic acid was found can attenuate airway inflammation and mucus hypersecretion in an ovalbumin-induced murine model of asthma via inhibiting the activation of NF- $\kappa$ B, ERK1/2 and p38 [32]. However, the pharmacological activity of 3-(4-Hydroxyphenyl)acrylic acid 4-hydroxyphenethyl ester has not been reported yet, and further experiments are needed.

Overall, our results suggested that *Caulis Sargentodoxae* can treat UC through regulating HIF-1 signaling pathway and PI3K-Akt signaling pathway, but this effect is a synergistic effect of eight active components. It is necessary to further compare the therapeutic effects of *Caulis Sargentodoxae* and its different components in animal models, and further evaluate these molecules in terms of safety and higher efficacy. Analyzing and verifying the effective dose and toxicity of different molecules by using pharmacology and toxicology experiments will also have important significance for clinical applications.

## Data Availability

The data used to support the findings of the present study are included within the article and the supplementary files.

## Competing Interests

The authors declare that there are no competing interests associated with the manuscript.

## Funding

This work was supported by the Sichuan Medical Youth Innovative Scientific Research Project [grant number Q19045]; and the Chengdu Medical College Fund Natural Science General Project [grant numbers CYZ19-19, CYZ19-36].

## Author Contribution

G.Z. and B.L. designed the present study. B.L., X.Z., J.Y. and W.L. collected and organized the data. B.L., X.Z., J.L., X.L. and R.W. completed the data analysis and chart processing. B.L. and X.Z. wrote the manuscript. G.Z. reviewed the manuscript.

## Abbreviations

BP, biological process; DL, drug-likeness; DSS, dextran sulphate sodium; EGFR, epidermal growth factor receptor; GEO, gene expression omnibus; GO, gene ontology; GWAS, genome-wide association studies; IFN, interferon; IL, interleukin; iNOS, inducible nitric oxide synthase; KEGG, Kyoto Encyclopedia of Genes and Genomes; LPS, lipopolysaccharide; MW, molecular weight; OB, oral bioavailability; PPI, protein-protein interaction; TCMS, Traditional Chinese Medicine Systems Pharmacology Database and Analysis Platform; Th17, T helper cell 17; TLR5, toll like receptor 5; Treg, regulatory T cell; UC, ulcerative colitis.

## References

- Ungaro, R., Mehandru, S., Allen, P.B., Peyrin-Biroulet, L. and Colombel, J.F. (2017) Ulcerative colitis. *Lancet* **389**, 1756–1770, [https://doi.org/10.1016/S0140-6736\(16\)32126-2](https://doi.org/10.1016/S0140-6736(16)32126-2)
- Hindryckx, P., Jairath, V. and D'Haens, G. (2016) Acute severe ulcerative colitis: from pathophysiology to clinical management. *Nat. Rev. Gastroenterol. Hepatol.* **13**, 654–664, <https://doi.org/10.1038/nrgastro.2016.116>
- Feuerstein, J.D., Moss, A.C. and Farraye, F.A. (2019) Ulcerative colitis. *Mayo Clin. Proc.* **94**, 1357–1373, <https://doi.org/10.1016/j.mayocp.2019.01.018>
- Kayal, M. and Shah, S. (2019) Ulcerative colitis: current and emerging treatment strategies. *J. Clin. Med.* **9**, <https://doi.org/10.3390/jcm9010094>
- Kobayashi, T., Siegmund, B., Le Berre, C., Wei, S.C., Ferrante, M., Shen, B. et al. (2020) Ulcerative colitis. *Nat. Rev. Dis. Primers* **6**, 74, <https://doi.org/10.1038/s41572-020-0205-x>



- 6 Cao, S.Y., Ye, S.J., Wang, W.W., Wang, B., Zhang, T. and Pu, Y.Q. (2019) Progress in active compounds effective on ulcerative colitis from Chinese medicines. *Chin. J. Nat. Med.* **17**, 81–102, [https://doi.org/10.1016/S1875-5364\(19\)30012-3](https://doi.org/10.1016/S1875-5364(19)30012-3)
- 7 Yan, Y.X., Shao, M.J., Qi, Q., Xu, Y.S., Yang, X.Q., Zhu, F.H. et al. (2018) Artemisinin analogue SM934 ameliorates DSS-induced mouse ulcerative colitis via suppressing neutrophils and macrophages. *Acta Pharmacol. Sin.* **39**, 1633–1644, <https://doi.org/10.1038/aps.2017.185>
- 8 Naganuma, M., Sugimoto, S., Mitsuyama, K., Kobayashi, T., Yoshimura, N., Ohi, H. et al. (2018) Efficacy of indigo naturalis in a multicenter randomized controlled trial of patients with ulcerative colitis. *Gastroenterology* **154**, 935–947, <https://doi.org/10.1053/j.gastro.2017.11.024>
- 9 Kibble, M., Saarinen, N., Tang, J., Wennerberg, K., Mäkelä, S. and Aittokallio, T. (2015) Network pharmacology applications to map the unexplored target space and therapeutic potential of natural products. *Nat. Prod. Rep.* **32**, 1249–1266, <https://doi.org/10.1039/C5NP00005J>
- 10 Luo, T.T., Lu, Y., Yan, S.K., Xiao, X., Rong, X.L. and Guo, J. (2020) Network pharmacology in research of chinese medicine formula: methodology, application and prospective. *Chinese J. Integr. Med.* **26**, 72–80, <https://doi.org/10.1007/s11655-019-3064-0>
- 11 Gu, S., Xue, Y., Gao, Y., Shen, S., Zhang, Y., Chen, K. et al. (2020) Mechanisms of indigo naturalis on treating ulcerative colitis explored by GEO gene chips combined with network pharmacology and molecular docking. *Sci. Rep.* **10**, 15204, <https://doi.org/10.1038/s41598-020-71030-w>
- 12 Yang, L., Yin, P., Cao, X. and Liu, Y. (2019) Screen for potential candidate alternatives of sargentodoxa cuneata from its six adulterants based on their phenolic compositions and antioxidant activities. *Int. J. Mol. Sci.* **20**, <https://doi.org/10.3390/ijms20215427>
- 13 Ru, J., Li, P., Wang, J., Zhou, W., Li, B., Huang, C. et al. (2014) TCMSP: a database of systems pharmacology for drug discovery from herbal medicines. *J. Cheminformatics* **6**, 13, <https://doi.org/10.1186/1758-2946-6-13>
- 14 Daina, A., Michielin, O. and Zoete, V. (2019) SwissTargetPrediction: updated data and new features for efficient prediction of protein targets of small molecules. *Nucleic Acids Res.* **47**, W357–W364, <https://doi.org/10.1093/nar/gkz382>
- 15 Yao, Z.J., Dong, J., Che, Y.J., Zhu, M.F., Wen, M., Wang, N.N. et al. (2016) TargetNet: a web service for predicting potential drug-target interaction profiling via multi-target SAR models. *J. Comput. Aided Mol. Des.* **30**, 413–424, <https://doi.org/10.1007/s10822-016-9915-2>
- 16 Piñero, J., Ramírez-Anguila, J.M., Saüch-Pitarch, J., Ronzano, F., Centeno, E., Sanz, F. et al. (2020) The DisGeNET knowledge platform for disease genomics: 2019 update. *Nucleic Acids Res.* **48**, D845–D855
- 17 Szklarczyk, D., Gable, A.L., Lyon, D., Junge, A., Wyder, S., Huerta-Cepas, J. et al. (2019) STRING v11: protein-protein association networks with increased coverage, supporting functional discovery in genome-wide experimental datasets. *Nucleic Acids Res.* **47**, D607–D613, <https://doi.org/10.1093/nar/gky1131>
- 18 Cheng, F., Li, W., Zhou, Y., Shen, J., Wu, Z., Liu, G. et al. (2012) admetSAR: a comprehensive source and free tool for assessment of chemical ADMET properties. *J. Chem. Inf. Model.* **52**, 3099–3105, <https://doi.org/10.1021/ci300367a>
- 19 Yang, H., Lou, C., Sun, L., Li, J., Cai, Y., Wang, Z. et al. (2019) admetSAR 2.0: web-service for prediction and optimization of chemical ADMET properties. *Bioinformatics* **35**, 1067–1069, <https://doi.org/10.1093/bioinformatics/bty707>
- 20 Cao, F., Liu, J., Sha, B.X. and Pan, H.F. (2019) Natural products: experimental efficient agents for inflammatory bowel disease therapy. *Curr. Pharm. Des.* **25**, 4893–4913, <https://doi.org/10.2174/1381612825666191216154224>
- 21 Li, S. and Zhang, B. (2013) Traditional Chinese medicine network pharmacology: theory, methodology and application. *Chinese J. Nat. Med.* **11**, 110–120, [https://doi.org/10.1016/S1875-5364\(13\)60037-0](https://doi.org/10.1016/S1875-5364(13)60037-0)
- 22 Gao, Y., Wang, K.X., Wang, P., Li, X., Chen, J.J., Zhou, B.Y. et al. (2020) A novel network pharmacology strategy to decode mechanism of Lang Chuang Wan in treating systemic lupus erythematosus. *Front. Pharmacol.* **11**, 512877, <https://doi.org/10.3389/fphar.2020.512877>
- 23 Zhang, T., Pan, L., Cao, Y., Liu, N., Wei, W. and Li, H. (2020) Identifying the mechanisms and molecular targets of Yizhiqingxin formula on Alzheimer's disease: coupling network pharmacology with GEO database. *Pharmacogenom. Personal. Med.* **13**, 487–502, <https://doi.org/10.2147/PGPM.S269726>
- 24 Yao, J., Wei, C., Wang, J.Y., Zhang, R., Li, Y.X. and Wang, L.S. (2015) Effect of resveratrol on Treg/Th17 signaling and ulcerative colitis treatment in mice. *World J. Gastroenterol.* **21**, 6572–6581, <https://doi.org/10.3748/wjg.v21.i21.6572>
- 25 Wei, J. and Feng, J. (2010) Signaling pathways associated with inflammatory bowel disease. *Recent Patents on Inflammation & Allergy Drug Discovery* **4**, 105–117, <https://doi.org/10.2174/187221310791163071>
- 26 Li, X., Liu, Y., Chu, S., Yang, S., Peng, Y., Ren, S. et al. (2019) Physcion and physcion 8-O- $\beta$ -glucopyranoside: A review of their pharmacology, toxicities and pharmacokinetics. *Chem. Biol. Interact.* **310**, 108722, <https://doi.org/10.1016/j.cbi.2019.06.035>
- 27 Selim, N.M., Elgazar, A.A., Abdel-Hamid, N.M., El-Magd, M.R.A., Yasri, A., Hefnawy, H.M.E. et al. (2019) Chrysophanol, Physcion, Hesperidin and Curcumin modulate the gene expression of pro-inflammatory mediators induced by LPS in HepG2: in silico and molecular studies. *Antioxidants* **8**, <https://doi.org/10.3390/antiox8090371>
- 28 Dong, X., Fu, J., Yin, X., Cao, S., Li, X., Lin, L. et al. (2016) Emodin: a review of its pharmacology, toxicity and pharmacokinetics. *Phytother. Res.* **30**, 1207–1218, <https://doi.org/10.1002/ptr.5631>
- 29 Zheng, X.Y., Yang, S.M., Zhang, R., Wang, S.M., Li, G.B. and Zhou, S.W. (2019) Emodin-induced autophagy against cell apoptosis through the PI3K/AKT/mTOR pathway in human hepatocytes. *Drug Des. Dev. Ther.* **13**, 3171–3180, <https://doi.org/10.2147/DDDT.S204958>
- 30 Luo, S., Deng, X., Liu, Q., Pan, Z., Zhao, Z., Zhou, L. et al. (2018) Emodin ameliorates ulcerative colitis by the flagellin-TLR5 dependent pathway in mice. *Int. Immunopharmacol.* **59**, 269–275, <https://doi.org/10.1016/j.intimp.2018.04.010>
- 31 Zhu, T., Zhang, W., Feng, S.J. and Yu, H.P. (2016) Emodin suppresses LPS-induced inflammation in RAW264.7 cells through a PPAR $\gamma$ -dependent pathway. *Int. Immunopharmacol.* **34**, 16–24, <https://doi.org/10.1016/j.intimp.2016.02.014>
- 32 Song, J.W., Seo, C.S., Cho, E.S., Kim, T.I., Won, Y.S., Kwon, H.J. et al. (2016) meso-Dihydroguaiaretic acid attenuates airway inflammation and mucus hypersecretion in an ovalbumin-induced murine model of asthma. *Int. Immunopharmacol.* **31**, 239–247, <https://doi.org/10.1016/j.intimp.2015.12.033>
